# Supplementary material
Source: publisher figshare collection journal article supplement (https://tandf.figshare.com/ndownloader/files/12997070)
Supplement: Supplementary file 1 [file 12997070]

Conc. = 0.1782 (%Vol)
Surface weighted mean: 49.273µm
Vol. weighted mean: 380.936µm
